# Supplementary material for: An Adaptive Exponentially Weighted Moving Average Based Support Vector Data Description Machine for Multivariate Process
Source: Research Square preprint supplement (doi:10.21203/rs.3.rs-4179636/v1), 2024-04-10
Supplement: Supplementary file 1 [file 916ee2c33a55344d9c7e8bed.xlsx]

## Sheet: qualitas clinker Januari
FCaO	C3S	C2S	C3A	C4Af
1	58.9	14.44	7.78	10.46
1.06	58.33	14.95	7.75	10.52
1.13	57.61	15.07	7.98	10.58
1.1	59.07	13.93	7.86	10.37
1.8	61.52	8.16	7.55	10.21
1.89	61.68	7.86	7.22	10.46
2.16	61.35	6.31	7.46	10.46
1.2	62.27	9.93	7.32	10.52
1.5	60.29	10.52	7.32	10.76
1.25	58.26	13.52	7.6	10.73
1.06	58.42	14.51	7.82	10.43
1.28	57.53	13.83	7.89	10.79
0.75	57.91	15.36	8.33	10.61
1.3	57.5	13.27	8.18	10.55
1.03	58.83	13.09	8.24	10.49
1	58.17	13.55	8.14	10.58
1.08	58.39	13.49	8.18	10.55
1.54	57.78	11.69	7.83	10.46
1.91	58.82	9.52	7.95	10.4
2.04	57.69	10.05	7.98	10.67
0.9	54.87	17.53	8.59	10.67
0.71	52.77	20.25	8.78	10.76
0.7	53.17	19.17	8.36	11.37
0.85	55.21	16.05	8.22	11.25
1.5	53.92	14.71	8.29	11.22
1.08	56.22	14.96	8.25	11.19
0.82	51.04	20.82	8.76	10.94
0.8	53.33	18.78	8.58	11.16
1.47	53.5	16.76	8.7	10.52
2.37	53.42	13.25	8.38	10.43
2.17	56.47	11.3	8.25	10.34
1.49	57.25	13.48	8.26	10.12
1.23	57.08	13.77	8.17	10.67
1.95	54.55	13.63	8.19	10.73
2.07	59.34	8.74	7.78	10.55
2.18	56.38	10.63	8.19	10.49
1.2	59.13	11.4	8.46	10
1	57.55	13.99	8.86	10.28
0.98	56.02	15.54	9.02	9.94
1.1	57.8	13.53	8.88	10.09
2.48	58.74	7.67	8.47	10.12
2.2	55.98	11.55	8.45	10.21
1.66	58.34	11.88	8.27	10
1.83	58.43	10.71	8.34	10.12
1.84	60.42	8.82	7.93	10.34
1.8	60.04	9.72	7.77	10.24
1.32	59.21	12.68	8.1	9.97
1.5	59.74	11.22	8.11	10.06
1.2	59.17	12.61	8.31	10.03
1.6	58.9	11.37	7.94	10.03
1.4	57.91	12.64	8.35	10
2.48	60.01	7.42	7.76	10.06
2.02	60.34	8.44	7.87	10.21
2	58.73	9.98	7.92	10.14
1.82	57.94	11.38	8.26	10.1
1.75	57.2	12.22	8.29	10.11
1.85	60.36	8.62	8.03	10.35
1.9	55.83	12.39	8.56	9.86
3.98	60.34	-0.66	8.42	10.02
1.69	59.41	10.04	8.46	9.86
1.5	61.86	8.27	8.47	9.79
0.82	59.61	13.72	8.15	9.95
1.36	60.99	9.61	8.09	10.08
1.36	56.75	13.9	8.78	9.76
1.77	57.32	11.36	8.59	9.99
1.52	56.59	13.46	8.07	10.28
1.49	58.61	12.1	8.15	10.16
1.02	60.41	13.38	8.25	10.28
1	61.06	12.51	8.25	10.32
1.57	57.84	12.5	8.13	9.73
1.12	61.15	11.46	7.94	9.85
1.41	60.54	10.85	7.99	9.82
1.48	55.12	15.22	8.13	10.21
1.22	55.67	15.69	8.16	10.38
1.52	58.78	11.95	8.13	9.86
1.18	55	16.64	8.34	9.77
1.32	57.16	13.97	8.18	9.95
1.59	59.06	11.27	8.15	9.93
1.4	58.62	12.59	8.22	9.92
1.5	57.76	13.06	8.51	10.12
1.2	59.19	12.82	8.5	10.06
1.62	57.51	12.71	8.43	10.1
1.7	55.81	13.5	8.26	10.48
2.44	60.43	6.65	7.99	10.47
1.92	63.01	6.81	7.65	10.43
2.15	66.93	1.02	7.28	10.82
2.25	67.4	0.4	7.11	10.67
2.16	63.45	4.63	7.34	10.59
1.97	55.66	13.06	8.14	10.26
1.52	55.63	14.59	8.14	10.42
1.26	58.03	13.16	8.09	10.61
1.02	57.73	14.1	8.18	10.9
1.48	57.46	13.33	8.29	10.42
1.74	57.54	12.19	8.33	10.41
2.5	57.19	9.26	8.06	10.45
2.64	66.18	1.57	9.65	7.19
2.3	58.44	8.56	8.17	10.41
2.48	63.88	3.02	8.04	9.56
1.9	64.31	4.54	8.16	9.96
1.97	60.26	7.77	8.12	10.41
